# Supplementary material
Source: PubMed Central journal article supplement (PMC3005909)
Supplement: NIHMS238329-supplement-1_si_001.pdf [file NIHMS238329-supplement-1_si_001.pdf]

*Supplementary Materials for*

**Intramolecular Heme Ligation of the CYP2C9-  
R108H Mutant Demonstrates Pronounced  
Conformational Flexibility of the B-C Loop  
Region: Implications for Substrate Binding**

*Arthur G. Roberts<sup>a,d</sup>, Matthew J. Cheesman<sup>a,e</sup>, Andrew Primak<sup>b</sup>,*

*Michael K. Bowman<sup>c</sup>, William M. Atkins<sup>a</sup>, and Allan E. Rettie<sup>a</sup>.*

<sup>a</sup>University of Washington, Department of Medicinal Chemistry, Seattle, WA 98195.<sup>b</sup>

Siemens Medical Solutions USA, Malvern, PA 19355. <sup>c</sup>University of Alabama,

Department of Chemistry, Tuscaloosa, AL 35487-0336.

Email: [a1roberts@ucsd.edu](mailto:a1roberts@ucsd.edu)

RUNNING TITLE: Conformational flexibility of CYP2C9.

<sup>d</sup>Correspondence should be addressed to the University of California, San Diego, The Skaggs School of Pharmacy and Pharmaceutical Sciences, 9500 Gilman Drive #0703, La Jolla, CA 92093-0703. Telephone: (858) 822-7804. Fax (858) 246-0089. <sup>e</sup>The University of Queensland, School of Biomedical Sciences, Brisbane QLD 4072, AUSTRALIA.

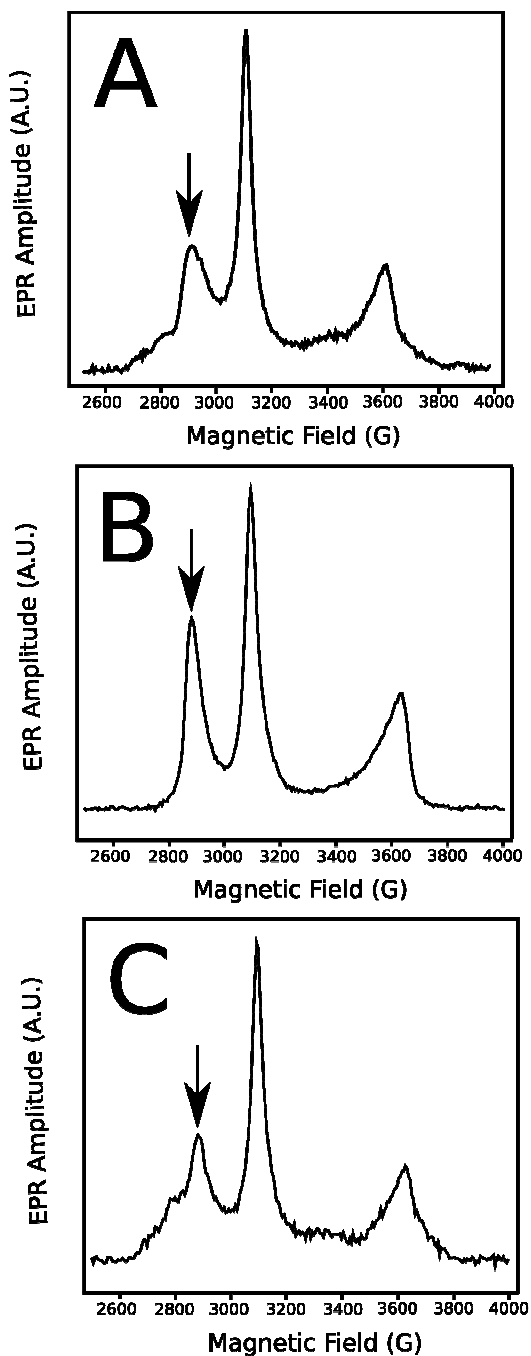

**Figure S1.** Spin echo-detected EPR spectra are shown for A) CYP2C9, B) the R108H mutant and C) CYP2C9 with 100 mM imidazole. The spectra were measured with the spacing between the two microwave pulses at  $\tau=160$  ns in order to emphasize the principal g-values as a result of the orientation dependence of the ESEEM and the phase memory relaxation of the sample. The g-values of the EPR peaks under the various conditions were similar. The arrow denotes the position where the HYSCORE spectra were measured.

**Table S1.** *Additional Force field parameters used for CYP2C9<sup>a</sup>*

| Bond | Energy (kcal mol <sup>-1</sup> Å <sup>-2</sup> ) | Distance (Å) <sup>b</sup> | Reference |
|------|--------------------------------------------------|---------------------------|-----------|
| Fe-S | 87.589                                           | 2.377                     | (1)       |

  

| Angle <sup>c</sup>   | Energy (kcal mol <sup>-1</sup> rad <sup>-2</sup> ) | Reference |
|----------------------|----------------------------------------------------|-----------|
| Fe-S-C <sub>β</sub>  | 21.646                                             | (1)       |
| N <sub>P</sub> -Fe-S | 13.277                                             | (1)       |

  

| Dihedral <sup>c</sup>               | Energy (kcal mol <sup>-1</sup> ) | Reference |
|-------------------------------------|----------------------------------|-----------|
| C <sub>β</sub> -S-Fe-N <sub>P</sub> | 0.034 <sup>d</sup>               | (1)       |

<sup>a</sup> Fe, heme iron; S, sulfur of C435; C<sub>β</sub>, C<sub>β</sub> of C435; N<sub>P</sub>, pyrrole heme nitrogen.

<sup>b</sup> Equilibrium distance value from (1).

<sup>c</sup> The angles and dihedrals, used in the simulations, were calculated using the values measured from the 1R9O CYP2C9 X-ray crystal structure (2).

<sup>d</sup> Autenrieth et al., 2004 obtained energy values for cytochrome c of 0.04 kcal mol<sup>-1</sup>(3)

**Table S2.** Additional force field parameters for R108H CYP2C9<sup>a</sup>

| Bond              | Energy (kcal mol <sup>-1</sup> Å <sup>-2</sup> ) | Distance (Å)      | Reference |
|-------------------|--------------------------------------------------|-------------------|-----------|
| Fe-N <sub>ε</sub> | 65 <sup>b</sup>                                  | 2.05 <sup>c</sup> | (3)       |

  

| Angle                             | Energy (kcal mol <sup>-1</sup> rad <sup>-2</sup> ) | Angle (degrees) | Reference |
|-----------------------------------|----------------------------------------------------|-----------------|-----------|
| N <sub>P</sub> -Fe-N <sub>ε</sub> | 50                                                 | 90 <sup>o</sup> | (4)       |

  

| Improper Dihedral                                  | Energy (kcal mol <sup>-1</sup> rad <sup>-2</sup> ) | Angle (degrees) | Reference |
|----------------------------------------------------|----------------------------------------------------|-----------------|-----------|
| N <sub>ε</sub> -C <sub>δ</sub> -C <sub>ε</sub> -Fe | 29.4                                               | 0 <sup>o</sup>  | (3)       |

<sup>a</sup> N<sub>ε</sub>, C<sub>δ</sub> and C<sub>ε</sub> correspond to atoms on H108 of the mutant.

<sup>b</sup> Henry et al., 1985 obtained similar values for hemoglobin of 60 kcal mol<sup>-1</sup> Å<sup>-2</sup>.

<sup>c</sup> Intermediate value between 2-2.1 Å that was used previously in (1, 3, 4).

## References

1. Oda, A., Yamaotsu, N., and Hirono, S. (2005) New AMBER force field parameters of heme iron for cytochrome P450s determined by quantum chemical calculations of simplified models, *J. Comput. Chem.* 26, 818-826.
2. Wester, M. R., Yano, J. K., Schoch, G. A., Yang, C., Griffin, K. J., Stout, C. D., and Johnson, E. F. (2004) The structure of human cytochrome P450 2C9 complexed with flurbiprofen at 2.0-Å resolution, *J. Biol. Chem.* 279, 35630-35637.
3. Autenrieth, F., Tajkhorshid, E., Baudry, J., and Luthey-Schulten, Z. (2004) Classical force field parameters for the heme prosthetic group of cytochrome c, *J. Comput. Chem.* 25, 1613-1622.
4. Henry, E. R., Levitt, M., and Eaton, W. A. (1985) Molecular dynamics simulation of photodissociation of carbon monoxide from hemoglobin, *Proc. Natl. Acad. Sci. U. S. A.* 82, 2034-2038.
